# Supplementary material for: A Pan-Cancer Analysis of the Oncogenic and Immunogenic Role of m6Am Methyltransferase PCIF1
Source: Front Oncol. 2021 Nov 23;11:753393. doi: 10.3389/fonc.2021.753393 (PMC8650698; doi:10.3389/fonc.2021.753393)
Supplement: Supplementary file 4 [file Table_1.xlsx]

## Sheet: Table S1
Table S1. The top-100 PCIF1 correlated genes
#node1	node2	node1_string_id	node2_string_id	neighborhood_on_chromosome	gene_fusion	phylogenetic_cooccurrence	homology	coexpression	experimentally_determined_interaction	database_annotated	automated_textmining	combined_score
AGTPBP1	RASGEF1B	9606.ENSP00000338512	9606.ENSP00000264400	0	0	0	0	0.061	0	0	0.234	0.25
AGTPBP1	HSPBAP1	9606.ENSP00000338512	9606.ENSP00000302562	0	0	0	0	0	0	0	0.383	0.383
AGTPBP1	PCIF1	9606.ENSP00000338512	9606.ENSP00000361486	0	0	0	0	0.064	0	0	0.268	0.285
ALKBH4	ALKBH7	9606.ENSP00000292566	9606.ENSP00000245812	0	0	0	0	0.064	0	0	0.873	0.876
ALKBH4	TRIP4	9606.ENSP00000292566	9606.ENSP00000261884	0	0	0	0	0	0	0	0.317	0.317
ALKBH4	HSPBAP1	9606.ENSP00000292566	9606.ENSP00000302562	0	0	0	0	0	0	0	0.228	0.228
ALKBH4	PCIF1	9606.ENSP00000292566	9606.ENSP00000361486	0	0	0	0	0	0	0	0.301	0.301
ALKBH4	METTL4	9606.ENSP00000292566	9606.ENSP00000458290	0	0	0	0	0.055	0	0	0.664	0.669
ALKBH4	ALKBH6	9606.ENSP00000292566	9606.ENSP00000368152	0	0	0	0	0	0	0	0.838	0.838
ALKBH4	ALKBH8	9606.ENSP00000292566	9606.ENSP00000397673	0	0	0	0	0.062	0	0	0.874	0.877
ALKBH6	ALKBH7	9606.ENSP00000368152	9606.ENSP00000245812	0	0	0	0	0.064	0	0	0.899	0.902
ALKBH6	TRIP4	9606.ENSP00000368152	9606.ENSP00000261884	0	0	0	0	0	0	0	0.283	0.283
ALKBH6	HSPBAP1	9606.ENSP00000368152	9606.ENSP00000302562	0	0	0	0	0	0	0	0.256	0.256
ALKBH6	PCIF1	9606.ENSP00000368152	9606.ENSP00000361486	0	0	0	0	0	0	0	0.246	0.246
ALKBH6	ALKBH8	9606.ENSP00000368152	9606.ENSP00000397673	0	0	0	0.628	0.062	0	0	0.859	0.359
ALKBH6	METTL4	9606.ENSP00000368152	9606.ENSP00000458290	0	0	0	0	0.061	0	0	0.44	0.452
ALKBH7	PCIF1	9606.ENSP00000245812	9606.ENSP00000361486	0	0	0	0	0	0	0	0.302	0.302
ALKBH7	TRIP4	9606.ENSP00000245812	9606.ENSP00000261884	0	0	0	0	0.064	0	0	0.324	0.34
ALKBH7	METTL4	9606.ENSP00000245812	9606.ENSP00000458290	0	0	0	0	0.062	0	0	0.48	0.492
ALKBH7	ALKBH8	9606.ENSP00000245812	9606.ENSP00000397673	0	0	0	0	0.049	0	0	0.863	0.864
ALKBH8	DHPS	9606.ENSP00000397673	9606.ENSP00000210060	0	0	0	0	0.212	0	0	0	0.212
ALKBH8	UTP18	9606.ENSP00000397673	9606.ENSP00000225298	0	0	0	0	0.233	0.073	0	0	0.258
ALKBH8	TRIP4	9606.ENSP00000397673	9606.ENSP00000261884	0	0	0	0	0.064	0	0	0.46	0.472
ALKBH8	RRM1	9606.ENSP00000397673	9606.ENSP00000300738	0.071	0	0	0	0.077	0.185	0	0.113	0.297
ALKBH8	HSPBAP1	9606.ENSP00000397673	9606.ENSP00000302562	0	0	0	0	0.061	0	0	0.463	0.474
ALKBH8	TSC22D2	9606.ENSP00000397673	9606.ENSP00000354543	0	0	0	0	0	0	0	0.268	0.268
ALKBH8	PCIF1	9606.ENSP00000397673	9606.ENSP00000361486	0	0	0	0	0.142	0	0	0.2	0.284
ALKBH8	RBM34	9606.ENSP00000397673	9606.ENSP00000386226	0	0	0	0	0.115	0.075	0	0.05	0.154
ALKBH8	MMS19	9606.ENSP00000397673	9606.ENSP00000412698	0	0	0	0	0.325	0	0	0	0.325
ALKBH8	METTL4	9606.ENSP00000397673	9606.ENSP00000458290	0	0	0	0	0.062	0	0	0.536	0.546
ARHGAP42	PDS5B	9606.ENSP00000298815	9606.ENSP00000313851	0	0	0	0	0	0	0	0.163	0.163
ARHGAP42	MAP1S	9606.ENSP00000298815	9606.ENSP00000325313	0	0	0	0	0	0	0	0.255	0.255
ARHGAP42	ZHX3	9606.ENSP00000298815	9606.ENSP00000312222	0	0	0	0	0	0	0	0.306	0.306
ARHGAP42	COPRS	9606.ENSP00000298815	9606.ENSP00000304327	0	0	0	0	0	0	0	0.306	0.306
ARHGAP42	MED1	9606.ENSP00000298815	9606.ENSP00000300651	0	0	0	0	0	0.341	0	0	0.341
ARHGAP42	CORO6	9606.ENSP00000298815	9606.ENSP00000344562	0	0	0	0	0	0	0	0.345	0.345
ARHGAP42	ZNF335	9606.ENSP00000298815	9606.ENSP00000325326	0	0	0	0	0	0.083	0	0.325	0.354
ARHGAP42	PCIF1	9606.ENSP00000298815	9606.ENSP00000361486	0	0	0	0	0.064	0	0	0.345	0.36
ARHGAP42	MSANTD1	9606.ENSP00000298815	9606.ENSP00000411584	0	0	0	0	0	0	0	0.46	0.46
ARHGAP42	FIGN	9606.ENSP00000298815	9606.ENSP00000333836	0	0	0	0	0.066	0.263	0	0.29	0.469
ARMCX1	PCIF1	9606.ENSP00000361917	9606.ENSP00000361486	0	0	0	0	0	0	0	0.343	0.343
ARMCX1	ZNF473	9606.ENSP00000361917	9606.ENSP00000472808	0	0	0	0	0	0	0	0.202	0.202
ARMCX1	STOML1	9606.ENSP00000361917	9606.ENSP00000442478	0	0	0	0	0.061	0	0	0.282	0.297
ARMCX1	FBXO48	9606.ENSP00000361917	9606.ENSP00000367193	0	0	0	0	0	0	0	0.352	0.351
ARMCX1	WDR73	9606.ENSP00000361917	9606.ENSP00000387982	0	0	0	0	0	0	0	0.358	0.358
ARMCX1	RBM34	9606.ENSP00000361917	9606.ENSP00000386226	0	0	0	0	0	0	0	0.439	0.439
BCL7B	BUD13	9606.ENSP00000411073	9606.ENSP00000260210	0	0	0	0	0	0	0	0.312	0.311
BCL7B	PCIF1	9606.ENSP00000411073	9606.ENSP00000361486	0	0	0	0	0	0	0	0.348	0.347
BCL7B	CCDC121	9606.ENSP00000411073	9606.ENSP00000412150	0	0	0	0	0	0	0	0.19	0.19
BCL7B	ZNF664	9606.ENSP00000411073	9606.ENSP00000441405	0	0	0	0	0	0	0	0.321	0.321
BTBD19	TAF4	9606.ENSP00000395461	9606.ENSP00000252996	0	0	0	0	0.061	0	0	0.46	0.471
BTBD19	POLR2K	9606.ENSP00000395461	9606.ENSP00000342889	0	0	0	0	0	0	0	0.571	0.571
BTBD19	PCIF1	9606.ENSP00000395461	9606.ENSP00000361486	0	0	0	0	0	0	0	0.533	0.533
BTBD19	MYADM	9606.ENSP00000395461	9606.ENSP00000375649	0	0	0	0	0	0	0	0.578	0.578
BUD13	CCDC92	9606.ENSP00000260210	9606.ENSP00000238156	0	0	0	0	0	0	0	0.516	0.516
BUD13	POLR2A	9606.ENSP00000260210	9606.ENSP00000480158	0	0	0	0	0.063	0.064	0	0.138	0.178
BUD13	PLTP	9606.ENSP00000260210	9606.ENSP00000417138	0	0	0	0	0	0	0	0.241	0.241
BUD13	DNAH10	9606.ENSP00000260210	9606.ENSP00000386770	0	0	0	0	0	0	0	0.241	0.241
BUD13	PCIF1	9606.ENSP00000260210	9606.ENSP00000361486	0	0	0	0	0.066	0	0	0.295	0.313
BUD13	RBM34	9606.ENSP00000260210	9606.ENSP00000386226	0	0	0	0	0.061	0.349	0	0.097	0.399
BUD13	ZNF664	9606.ENSP00000260210	9606.ENSP00000441405	0	0	0	0	0	0	0	0.43	0.43
BUD13	ZNF335	9606.ENSP00000260210	9606.ENSP00000325326	0	0	0	0	0	0	0	0.434	0.434
BUD13	C2orf16	9606.ENSP00000260210	9606.ENSP00000386190	0	0	0	0	0	0	0	0.441	0.441
BUD13	GTF3C2	9606.ENSP00000260210	9606.ENSP00000352536	0	0	0	0	0	0	0	0.457	0.457
BUD13	CCDC121	9606.ENSP00000260210	9606.ENSP00000412150	0	0	0	0	0	0	0	0.549	0.549
BUD13	ZNF512	9606.ENSP00000260210	9606.ENSP00000347648	0	0	0	0	0	0.393	0	0.415	0.63
BUD13	RRM1	9606.ENSP00000260210	9606.ENSP00000300738	0	0	0	0	0	0	0	0.659	0.659
C2orf16	CCDC92	9606.ENSP00000386190	9606.ENSP00000238156	0	0	0	0	0	0	0	0.382	0.382
C2orf16	ZNF335	9606.ENSP00000386190	9606.ENSP00000325326	0	0	0	0	0	0	0	0.328	0.328
C2orf16	ZNF512	9606.ENSP00000386190	9606.ENSP00000347648	0	0	0	0	0	0	0	0.784	0.784
C2orf16	GTF3C2	9606.ENSP00000386190	9606.ENSP00000352536	0	0	0	0	0	0	0	0.473	0.473
C2orf16	PCIF1	9606.ENSP00000386190	9606.ENSP00000361486	0	0	0	0	0	0	0	0.354	0.354
C2orf16	DNAH10	9606.ENSP00000386190	9606.ENSP00000386770	0	0	0	0	0	0	0	0.329	0.329
C2orf16	ZNF664	9606.ENSP00000386190	9606.ENSP00000441405	0	0	0	0	0	0	0	0.355	0.355
C2orf16	CCDC121	9606.ENSP00000386190	9606.ENSP00000412150	0	0	0	0	0	0	0	0.732	0.732
CCDC121	CCDC92	9606.ENSP00000412150	9606.ENSP00000238156	0	0	0	0	0.06	0	0	0.532	0.541
CCDC121	ZNF335	9606.ENSP00000412150	9606.ENSP00000325326	0	0	0	0	0	0	0	0.468	0.468
CCDC121	ZNF512	9606.ENSP00000412150	9606.ENSP00000347648	0	0	0	0	0	0	0	0.707	0.707
CCDC121	GTF3C2	9606.ENSP00000412150	9606.ENSP00000352536	0	0	0	0	0	0	0	0.633	0.633
CCDC121	PCIF1	9606.ENSP00000412150	9606.ENSP00000361486	0	0	0	0	0	0	0	0.411	0.41
CCDC121	DNAH10	9606.ENSP00000412150	9606.ENSP00000386770	0	0	0	0	0.061	0	0	0.421	0.433
CCDC121	PLTP	9606.ENSP00000412150	9606.ENSP00000417138	0	0	0	0	0	0	0	0.216	0.216
CCDC121	ZNF664	9606.ENSP00000412150	9606.ENSP00000441405	0	0	0	0	0	0	0	0.46	0.46
CCDC92	PLTP	9606.ENSP00000238156	9606.ENSP00000417138	0	0	0	0	0	0	0	0.193	0.193
CCDC92	PCIF1	9606.ENSP00000238156	9606.ENSP00000361486	0	0	0	0	0	0	0	0.349	0.349
CCDC92	TSC22D2	9606.ENSP00000238156	9606.ENSP00000354543	0	0	0	0	0	0	0	0.358	0.358
CCDC92	ZNF512	9606.ENSP00000238156	9606.ENSP00000347648	0	0	0	0	0	0	0	0.393	0.393
CCDC92	ZNF335	9606.ENSP00000238156	9606.ENSP00000325326	0	0	0	0	0	0	0	0.397	0.397
CCDC92	GTF3C2	9606.ENSP00000238156	9606.ENSP00000352536	0	0	0	0	0	0	0	0.432	0.432
CCDC92	ZNF664	9606.ENSP00000238156	9606.ENSP00000441405	0	0	0	0	0	0	0	0.642	0.642
CCDC92	DNAH10	9606.ENSP00000238156	9606.ENSP00000386770	0	0	0	0	0.091	0	0	0.668	0.685
CDK9	MNAT1	9606.ENSP00000362361	9606.ENSP00000261245	0	0	0	0	0.098	0.093	0.9	0.169	0.922
CDK9	ERICH1	9606.ENSP00000362361	9606.ENSP00000262109	0	0	0	0	0	0	0	0.246	0.246
CDK9	SETD7	9606.ENSP00000362361	9606.ENSP00000274031	0	0	0	0	0.063	0	0	0.289	0.305
CDK9	MED1	9606.ENSP00000362361	9606.ENSP00000300651	0	0	0	0	0.1	0.993	0	0.181	0.994
CDK9	HDAC3	9606.ENSP00000362361	9606.ENSP00000302967	0	0	0	0	0.047	0	0	0.203	0.208
CDK9	LDB2	9606.ENSP00000362361	9606.ENSP00000306772	0	0	0	0	0	0	0	0.172	0.171
CDK9	RSBN1L	9606.ENSP00000362361	9606.ENSP00000334040	0	0	0	0	0	0	0	0.161	0.161
CDK9	POLR2K	9606.ENSP00000362361	9606.ENSP00000342889	0	0	0	0	0	0	0.9	0.053	0.901
CDK9	ZNF512	9606.ENSP00000362361	9606.ENSP00000347648	0	0	0	0	0	0.05	0	0.266	0.272
CDK9	PCIF1	9606.ENSP00000362361	9606.ENSP00000361486	0	0	0	0	0.071	0	0	0.269	0.292
CDK9	STK4	9606.ENSP00000362361	9606.ENSP00000361892	0	0	0.363	0.642	0	0	0	0	0.156
CDK9	SPOP	9606.ENSP00000362361	9606.ENSP00000377001	0	0	0	0	0.064	0	0	0.129	0.15
CDK9	STON2	9606.ENSP00000362361	9606.ENSP00000450857	0	0	0	0	0	0	0	0.165	0.165
CDK9	LDB1	9606.ENSP00000362361	9606.ENSP00000392466	0	0	0	0	0	0	0	0.175	0.175
CDK9	RBBP8	9606.ENSP00000362361	9606.ENSP00000382628	0	0	0	0	0	0	0	0.177	0.177
CDK9	SLC22A23	9606.ENSP00000362361	9606.ENSP00000385028	0	0	0	0	0	0	0	0.207	0.207
CDK9	FBXO25	9606.ENSP00000362361	9606.ENSP00000372274	0	0	0	0	0	0.117	0	0.147	0.215
CDK9	PXDC1	9606.ENSP00000362361	9606.ENSP00000369636	0	0	0	0	0	0	0	0.262	0.262
CDK9	HERC1	9606.ENSP00000362361	9606.ENSP00000390158	0	0	0	0	0.061	0	0	0.297	0.312
CDK9	MMS19	9606.ENSP00000362361	9606.ENSP00000412698	0	0	0	0	0.044	0	0.9	0.106	0.907
CDK9	POLR2A	9606.ENSP00000362361	9606.ENSP00000480158	0	0	0	0	0.1	0.454	0.9	0.858	0.992
COPRS	MAP1S	9606.ENSP00000304327	9606.ENSP00000325313	0	0	0	0	0	0	0	0.195	0.195
COPRS	FIGN	9606.ENSP00000304327	9606.ENSP00000333836	0	0	0	0	0	0	0	0.225	0.225
COPRS	ZHX3	9606.ENSP00000304327	9606.ENSP00000312222	0	0	0	0	0	0	0	0.242	0.242
COPRS	PDS5B	9606.ENSP00000304327	9606.ENSP00000313851	0	0	0	0	0	0	0	0.249	0.249
COPRS	ZNF335	9606.ENSP00000304327	9606.ENSP00000325326	0	0	0	0	0	0	0	0.263	0.263
COPRS	CORO6	9606.ENSP00000304327	9606.ENSP00000344562	0	0	0	0	0	0	0	0.28	0.28
COPRS	PCIF1	9606.ENSP00000304327	9606.ENSP00000361486	0	0	0	0	0	0	0	0.284	0.284
COPRS	MSANTD1	9606.ENSP00000304327	9606.ENSP00000411584	0	0	0	0	0	0	0	0.404	0.404
CORO6	ZHX3	9606.ENSP00000344562	9606.ENSP00000312222	0	0	0	0	0.065	0	0	0.28	0.298
CORO6	PDS5B	9606.ENSP00000344562	9606.ENSP00000313851	0	0	0	0	0	0	0	0.152	0.151
CORO6	MAP1S	9606.ENSP00000344562	9606.ENSP00000325313	0	0	0	0	0.143	0	0	0.243	0.324
CORO6	ZNF335	9606.ENSP00000344562	9606.ENSP00000325326	0	0	0	0	0.064	0.041	0	0.302	0.319
CORO6	FIGN	9606.ENSP00000344562	9606.ENSP00000333836	0	0	0	0	0.082	0	0	0.268	0.299
CORO6	STK4	9606.ENSP00000344562	9606.ENSP00000361892	0	0	0	0	0.174	0	0	0	0.173
CORO6	GMPS	9606.ENSP00000344562	9606.ENSP00000419851	0.048	0	0	0	0	0	0	0.178	0.183
CORO6	NFIX	9606.ENSP00000344562	9606.ENSP00000380781	0	0	0	0	0.105	0	0	0.145	0.202
CORO6	PCIF1	9606.ENSP00000344562	9606.ENSP00000361486	0	0	0	0	0	0	0	0.324	0.323
CORO6	MSANTD1	9606.ENSP00000344562	9606.ENSP00000411584	0	0	0	0	0	0	0	0.445	0.445
CTAGE1	ERICH1	9606.ENSP00000375220	9606.ENSP00000262109	0	0	0	0	0	0	0	0.377	0.377
CTAGE1	FREM2	9606.ENSP00000375220	9606.ENSP00000280481	0	0	0	0	0	0	0	0.211	0.211
CTAGE1	RSBN1L	9606.ENSP00000375220	9606.ENSP00000334040	0	0	0	0	0	0	0	0.479	0.479
CTAGE1	ZNF521	9606.ENSP00000375220	9606.ENSP00000354794	0	0	0	0	0	0	0	0.346	0.345
CTAGE1	SPANXA2	9606.ENSP00000375220	9606.ENSP00000359549	0	0	0	0	0	0	0	0.541	0.541
CTAGE1	SPANXA1	9606.ENSP00000375220	9606.ENSP00000359550	0	0	0	0	0	0	0	0.538	0.538
CTAGE1	PCIF1	9606.ENSP00000375220	9606.ENSP00000361486	0	0	0	0	0	0	0	0.316	0.315
CTAGE1	SUGT1	9606.ENSP00000375220	9606.ENSP00000367208	0	0	0	0	0	0	0	0.23	0.229
CTAGE1	STOML3	9606.ENSP00000375220	9606.ENSP00000368952	0	0	0	0	0	0	0	0.226	0.225
CTAGE1	PXDC1	9606.ENSP00000375220	9606.ENSP00000369636	0	0	0	0	0	0	0	0.418	0.418
CTAGE1	USP3	9606.ENSP00000375220	9606.ENSP00000369681	0	0	0	0	0	0	0	0.167	0.167
CTAGE1	FBXO25	9606.ENSP00000375220	9606.ENSP00000372274	0	0	0	0	0	0	0	0.265	0.265
CTAGE1	STON2	9606.ENSP00000375220	9606.ENSP00000450857	0	0	0	0	0	0	0	0.227	0.226
CTAGE1	DIRC3	9606.ENSP00000375220	9606.ENSP00000389455	0	0	0	0	0	0	0	0.319	0.319
CTAGE1	SLC22A23	9606.ENSP00000375220	9606.ENSP00000385028	0	0	0	0	0	0	0	0.355	0.355
CTAGE1	RBBP8	9606.ENSP00000375220	9606.ENSP00000382628	0	0	0	0	0	0	0	0.398	0.398
DGCR2	PCIF1	9606.ENSP00000263196	9606.ENSP00000361486	0	0	0	0	0	0	0	0.255	0.254
DGCR2	FAM103A1	9606.ENSP00000263196	9606.ENSP00000307181	0	0	0	0	0	0	0	0.348	0.347
DHPS	MMS19	9606.ENSP00000210060	9606.ENSP00000412698	0	0	0	0	0.176	0	0	0	0.175
DHPS	PCIF1	9606.ENSP00000210060	9606.ENSP00000361486	0	0	0	0	0.246	0	0	0	0.245
DHPS	GMPS	9606.ENSP00000210060	9606.ENSP00000419851	0	0	0	0	0.641	0	0	0.116	0.669
DIRC3	UTP18	9606.ENSP00000389455	9606.ENSP00000225298	0	0	0	0	0.194	0	0	0.044	0.196
DIRC3	ERICH1	9606.ENSP00000389455	9606.ENSP00000262109	0	0	0	0	0	0	0	0.399	0.398
DIRC3	FREM2	9606.ENSP00000389455	9606.ENSP00000280481	0	0	0	0	0.062	0	0	0.221	0.238
DIRC3	HSPBAP1	9606.ENSP00000389455	9606.ENSP00000302562	0	0	0	0	0	0	0	0.8	0.8
DIRC3	RSBN1L	9606.ENSP00000389455	9606.ENSP00000334040	0	0	0	0	0	0	0	0.511	0.511
DIRC3	SEL1L	9606.ENSP00000389455	9606.ENSP00000337053	0	0	0	0	0	0	0	0.162	0.161
DIRC3	ZNF521	9606.ENSP00000389455	9606.ENSP00000354794	0	0	0	0	0	0	0	0.212	0.212
DIRC3	PCIF1	9606.ENSP00000389455	9606.ENSP00000361486	0	0	0	0	0.064	0	0	0.33	0.346
DIRC3	RPL10A	9606.ENSP00000389455	9606.ENSP00000363018	0.111	0	0	0	0.529	0.73	0	0.323	0.913
DIRC3	SUGT1	9606.ENSP00000389455	9606.ENSP00000367208	0	0	0	0	0.08	0	0	0.246	0.276
DIRC3	STOML3	9606.ENSP00000389455	9606.ENSP00000368952	0	0	0	0	0.063	0	0	0.26	0.277
DIRC3	PXDC1	9606.ENSP00000389455	9606.ENSP00000369636	0	0	0	0	0	0	0	0.426	0.426
DIRC3	USP3	9606.ENSP00000389455	9606.ENSP00000369681	0	0	0	0	0	0	0	0.174	0.173
DIRC3	FBXO25	9606.ENSP00000389455	9606.ENSP00000372274	0	0	0	0	0	0	0	0.269	0.269
DIRC3	SPOP	9606.ENSP00000389455	9606.ENSP00000377001	0	0	0	0	0	0	0	0.35	0.349
DIRC3	SLC22A23	9606.ENSP00000389455	9606.ENSP00000385028	0	0	0	0	0	0	0	0.389	0.388
DIRC3	GMPS	9606.ENSP00000389455	9606.ENSP00000419851	0	0	0	0	0.177	0	0	0	0.177
DIRC3	STON2	9606.ENSP00000389455	9606.ENSP00000450857	0	0	0	0	0	0	0	0.244	0.243
DIRC3	HERC1	9606.ENSP00000389455	9606.ENSP00000390158	0	0	0	0	0	0	0	0.285	0.284
DIRC3	POLR2A	9606.ENSP00000389455	9606.ENSP00000480158	0.076	0	0	0	0.178	0	0	0.149	0.297
DIRC3	RPL27	9606.ENSP00000389455	9606.ENSP00000464813	0.081	0	0	0	0.567	0.73	0	0.128	0.893
DNAH10	RASGEF1B	9606.ENSP00000386770	9606.ENSP00000264400	0	0	0	0	0	0.26	0	0.053	0.269
DNAH10	ZNF335	9606.ENSP00000386770	9606.ENSP00000325326	0	0	0	0	0	0	0	0.293	0.293
DNAH10	ZNF512	9606.ENSP00000386770	9606.ENSP00000347648	0	0	0	0	0	0	0	0.31	0.31
DNAH10	GTF3C2	9606.ENSP00000386770	9606.ENSP00000352536	0	0	0	0	0	0	0	0.267	0.267
DNAH10	TSC22D2	9606.ENSP00000386770	9606.ENSP00000354543	0	0	0	0	0	0	0	0.46	0.46
DNAH10	PCIF1	9606.ENSP00000386770	9606.ENSP00000361486	0	0	0	0	0	0	0	0.31	0.309
DNAH10	PLTP	9606.ENSP00000386770	9606.ENSP00000417138	0	0	0	0	0	0	0	0.172	0.171
DNAH10	ZNF664	9606.ENSP00000386770	9606.ENSP00000441405	0	0	0	0	0	0	0	0.656	0.656
DPM2	PCIF1	9606.ENSP00000322181	9606.ENSP00000361486	0	0	0	0	0	0	0	0.311	0.311
DPM2	HOOK2	9606.ENSP00000322181	9606.ENSP00000380785	0	0	0	0	0	0	0	0.334	0.334
ERG	ZNF335	9606.ENSP00000414150	9606.ENSP00000325326	0	0	0	0	0	0.064	0	0.248	0.266
ERG	SPANXA2	9606.ENSP00000414150	9606.ENSP00000359549	0	0	0	0	0	0	0	0.189	0.189
ERG	SPANXA1	9606.ENSP00000414150	9606.ENSP00000359550	0	0	0	0	0	0	0	0.188	0.188
ERG	PCIF1	9606.ENSP00000414150	9606.ENSP00000361486	0	0	0	0	0.061	0	0	0.268	0.283
ERG	SPOP	9606.ENSP00000414150	9606.ENSP00000377001	0	0	0	0	0.049	0.379	0	0.145	0.45
ERG	TYW1B	9606.ENSP00000414150	9606.ENSP00000482502	0	0	0	0	0	0	0	0.167	0.167
ERG	STIM1	9606.ENSP00000414150	9606.ENSP00000478059	0	0	0	0	0	0	0	0.318	0.317
ERICH1	OLFM4	9606.ENSP00000262109	9606.ENSP00000219022	0	0	0	0	0	0	0	0.325	0.325
ERICH1	USP3	9606.ENSP00000262109	9606.ENSP00000369681	0	0	0	0	0	0	0	0.244	0.243
ERICH1	USP39	9606.ENSP00000262109	9606.ENSP00000312981	0	0	0	0	0	0	0	0.25	0.25
ERICH1	STIM1	9606.ENSP00000262109	9606.ENSP00000478059	0	0	0	0	0	0	0	0.306	0.306
ERICH1	STOML3	9606.ENSP00000262109	9606.ENSP00000368952	0	0	0	0	0	0	0	0.31	0.309
ERICH1	SUGT1	9606.ENSP00000262109	9606.ENSP00000367208	0	0	0	0	0	0	0	0.311	0.311
ERICH1	LMTK3	9606.ENSP00000262109	9606.ENSP00000270238	0	0	0	0	0	0	0	0.401	0.401
ERICH1	SEL1L	9606.ENSP00000262109	9606.ENSP00000337053	0	0	0	0	0	0	0	0.406	0.406
ERICH1	HOOK2	9606.ENSP00000262109	9606.ENSP00000380785	0	0	0	0	0	0	0	0.411	0.411
ERICH1	ZNF521	9606.ENSP00000262109	9606.ENSP00000354794	0	0	0	0	0	0	0	0.42	0.42
ERICH1	RRM1	9606.ENSP00000262109	9606.ENSP00000300738	0	0	0	0	0	0	0	0.437	0.437
ERICH1	FZD3	9606.ENSP00000262109	9606.ENSP00000437489	0	0	0	0	0	0	0	0.438	0.438
ERICH1	RBBP8	9606.ENSP00000262109	9606.ENSP00000382628	0	0	0	0	0	0	0	0.475	0.475
ERICH1	FREM2	9606.ENSP00000262109	9606.ENSP00000280481	0	0	0	0	0	0	0	0.507	0.507
ERICH1	STON2	9606.ENSP00000262109	9606.ENSP00000450857	0	0	0	0	0	0	0	0.578	0.578
ERICH1	RSBN1L	9606.ENSP00000262109	9606.ENSP00000334040	0	0	0	0	0	0	0	0.632	0.632
ERICH1	FBXO25	9606.ENSP00000262109	9606.ENSP00000372274	0	0	0	0	0	0	0	0.652	0.652
ERICH1	SLC22A23	9606.ENSP00000262109	9606.ENSP00000385028	0	0	0	0	0	0	0	0.657	0.657
ERICH1	PCIF1	9606.ENSP00000262109	9606.ENSP00000361486	0	0	0	0	0	0	0	0.684	0.684
ERICH1	PXDC1	9606.ENSP00000262109	9606.ENSP00000369636	0	0	0	0	0	0	0	0.698	0.698
ERICH1	HERC1	9606.ENSP00000262109	9606.ENSP00000390158	0	0	0	0	0	0	0	0.72	0.72
FAM103A1	PCIF1	9606.ENSP00000307181	9606.ENSP00000361486	0	0	0	0	0	0	0	0.428	0.428
FBXO25	OLFM4	9606.ENSP00000372274	9606.ENSP00000219022	0	0	0	0	0	0	0	0.233	0.233
FBXO25	LMTK3	9606.ENSP00000372274	9606.ENSP00000270238	0	0	0	0	0	0	0	0.269	0.269
FBXO25	FREM2	9606.ENSP00000372274	9606.ENSP00000280481	0	0	0	0	0	0	0	0.417	0.417
FBXO25	RRM1	9606.ENSP00000372274	9606.ENSP00000300738	0	0	0	0	0	0	0	0.26	0.26
FBXO25	RSBN1L	9606.ENSP00000372274	9606.ENSP00000334040	0	0	0	0	0.064	0	0	0.513	0.524
FBXO25	SEL1L	9606.ENSP00000372274	9606.ENSP00000337053	0	0	0	0	0	0	0	0.387	0.387
FBXO25	ZNF521	9606.ENSP00000372274	9606.ENSP00000354794	0	0	0	0	0	0	0	0.317	0.317
FBXO25	PCIF1	9606.ENSP00000372274	9606.ENSP00000361486	0	0	0	0	0.066	0	0	0.545	0.557
FBXO25	FBXO48	9606.ENSP00000372274	9606.ENSP00000367193	0	0	0	0	0.059	0	0	0.364	0.376
FBXO25	SUGT1	9606.ENSP00000372274	9606.ENSP00000367208	0	0	0	0	0	0	0	0.211	0.211
FBXO25	STOML3	9606.ENSP00000372274	9606.ENSP00000368952	0	0	0	0	0	0	0	0.21	0.21
FBXO25	PXDC1	9606.ENSP00000372274	9606.ENSP00000369636	0	0	0	0	0	0	0	0.569	0.569
FBXO25	USP3	9606.ENSP00000372274	9606.ENSP00000369681	0	0	0	0	0.063	0	0	0.149	0.168
FBXO25	STIM1	9606.ENSP00000372274	9606.ENSP00000478059	0	0	0	0	0	0	0	0.191	0.191
FBXO25	FZD3	9606.ENSP00000372274	9606.ENSP00000437489	0	0	0	0	0.061	0	0	0.287	0.302
FBXO25	RBBP8	9606.ENSP00000372274	9606.ENSP00000382628	0	0	0	0	0	0	0	0.344	0.344
FBXO25	STON2	9606.ENSP00000372274	9606.ENSP00000450857	0	0	0	0	0	0	0	0.459	0.459
FBXO25	HOOK2	9606.ENSP00000372274	9606.ENSP00000380785	0	0	0	0	0	0	0	0.51	0.51
FBXO25	SLC22A23	9606.ENSP00000372274	9606.ENSP00000385028	0	0	0	0	0	0	0	0.516	0.516
FBXO25	SPOP	9606.ENSP00000372274	9606.ENSP00000377001	0	0	0	0	0	0	0.54	0	0.54
FBXO25	HERC1	9606.ENSP00000372274	9606.ENSP00000390158	0	0	0	0	0.061	0	0	0.567	0.576
FBXO48	PCIF1	9606.ENSP00000367193	9606.ENSP00000361486	0	0	0	0	0	0	0	0.522	0.522
FBXO48	STOML1	9606.ENSP00000367193	9606.ENSP00000442478	0	0	0	0	0	0	0	0.338	0.338
FBXO48	ZNF473	9606.ENSP00000367193	9606.ENSP00000472808	0	0	0	0	0	0	0	0.408	0.408
FBXO48	WDR73	9606.ENSP00000367193	9606.ENSP00000387982	0	0	0	0	0	0	0	0.409	0.408
FBXO48	RBM34	9606.ENSP00000367193	9606.ENSP00000386226	0	0	0	0	0	0	0	0.503	0.503
FIGN	ZHX3	9606.ENSP00000333836	9606.ENSP00000312222	0	0	0	0	0	0	0	0.227	0.227
FIGN	MAP1S	9606.ENSP00000333836	9606.ENSP00000325313	0	0	0	0	0.063	0	0	0.221	0.239
FIGN	ZNF335	9606.ENSP00000333836	9606.ENSP00000325326	0	0	0	0	0	0.05	0	0.249	0.256
FIGN	SEL1L	9606.ENSP00000333836	9606.ENSP00000337053	0.045	0	0	0	0.063	0.157	0	0.075	0.208
FIGN	PCIF1	9606.ENSP00000333836	9606.ENSP00000361486	0	0	0	0	0.051	0	0	0.268	0.275
FIGN	KATNAL1	9606.ENSP00000333836	9606.ENSP00000369989	0	0	0	0.733	0.064	0.149	0	0.55	0.287
FIGN	POLR2A	9606.ENSP00000333836	9606.ENSP00000480158	0	0	0	0	0.064	0.304	0	0.067	0.339
FIGN	MSANTD1	9606.ENSP00000333836	9606.ENSP00000411584	0	0	0	0	0	0	0	0.398	0.398
FREM2	OLFM4	9606.ENSP00000280481	9606.ENSP00000219022	0	0	0	0	0	0	0	0.252	0.252
FREM2	LMTK3	9606.ENSP00000280481	9606.ENSP00000270238	0	0	0	0	0	0	0	0.23	0.23
FREM2	SLC22A3	9606.ENSP00000280481	9606.ENSP00000275300	0	0	0	0	0.053	0	0	0.218	0.228
FREM2	HOOK2	9606.ENSP00000280481	9606.ENSP00000380785	0	0	0	0	0	0	0	0.151	0.151
FREM2	STIM1	9606.ENSP00000280481	9606.ENSP00000478059	0	0	0	0	0	0	0	0.152	0.152
FREM2	USP39	9606.ENSP00000280481	9606.ENSP00000312981	0	0	0	0	0.064	0	0	0.135	0.156
FREM2	GMPS	9606.ENSP00000280481	9606.ENSP00000419851	0.044	0	0	0	0.077	0	0	0.131	0.166
FREM2	HERC1	9606.ENSP00000280481	9606.ENSP00000390158	0	0	0	0	0.051	0	0	0.195	0.203
FREM2	SUGT1	9606.ENSP00000280481	9606.ENSP00000367208	0	0	0	0	0.066	0	0	0.231	0.251
FREM2	RRM1	9606.ENSP00000280481	9606.ENSP00000300738	0	0	0	0	0.061	0	0	0.242	0.258
FREM2	RBBP8	9606.ENSP00000280481	9606.ENSP00000382628	0	0	0	0	0	0	0	0.291	0.291
FREM2	SEL1L	9606.ENSP00000280481	9606.ENSP00000337053	0	0	0	0	0.062	0	0	0.279	0.295
FREM2	STOML3	9606.ENSP00000280481	9606.ENSP00000368952	0	0	0	0	0.062	0	0	0.287	0.302
FREM2	FZD3	9606.ENSP00000280481	9606.ENSP00000437489	0	0	0	0	0.094	0	0	0.262	0.303
FREM2	ZNF521	9606.ENSP00000280481	9606.ENSP00000354794	0	0	0	0	0.055	0.05	0	0.306	0.322
FREM2	STON2	9606.ENSP00000280481	9606.ENSP00000450857	0	0	0	0	0.063	0	0	0.457	0.469
FREM2	PCIF1	9606.ENSP00000280481	9606.ENSP00000361486	0	0	0	0	0.062	0	0	0.474	0.485
FREM2	RSBN1L	9606.ENSP00000280481	9606.ENSP00000334040	0	0	0	0	0	0	0	0.487	0.487
FREM2	SLC22A23	9606.ENSP00000280481	9606.ENSP00000385028	0	0	0	0	0.053	0	0	0.49	0.496
FREM2	PXDC1	9606.ENSP00000280481	9606.ENSP00000369636	0	0	0	0	0	0	0	0.515	0.515
FZD3	SLC22A3	9606.ENSP00000437489	9606.ENSP00000275300	0	0	0	0	0	0	0	0.156	0.156
FZD3	GPM6A	9606.ENSP00000437489	9606.ENSP00000280187	0	0	0	0	0.127	0	0	0.071	0.154
FZD3	ISX	9606.ENSP00000437489	9606.ENSP00000311492	0	0	0	0	0	0.157	0	0	0.156
FZD3	RSBN1L	9606.ENSP00000437489	9606.ENSP00000334040	0	0	0	0	0	0	0	0.299	0.299
FZD3	ZNF521	9606.ENSP00000437489	9606.ENSP00000354794	0	0	0	0	0	0.076	0	0.183	0.213
FZD3	PCIF1	9606.ENSP00000437489	9606.ENSP00000361486	0	0	0	0	0	0	0	0.418	0.418
FZD3	STK4	9606.ENSP00000437489	9606.ENSP00000361892	0	0	0	0	0.049	0	0	0.268	0.274
FZD3	PXDC1	9606.ENSP00000437489	9606.ENSP00000369636	0	0	0	0	0	0	0	0.38	0.38
FZD3	RBBP8	9606.ENSP00000437489	9606.ENSP00000382628	0	0	0	0	0	0	0	0.157	0.156
FZD3	SLC22A23	9606.ENSP00000437489	9606.ENSP00000385028	0	0	0	0	0	0	0	0.391	0.391
FZD3	STON2	9606.ENSP00000437489	9606.ENSP00000450857	0	0	0	0	0	0	0	0.307	0.307
GMPS	UTP18	9606.ENSP00000419851	9606.ENSP00000225298	0	0	0	0	0.836	0	0	0	0.836
GMPS	TRIP4	9606.ENSP00000419851	9606.ENSP00000261884	0	0	0	0	0.111	0	0	0.222	0.279
GMPS	RRM1	9606.ENSP00000419851	9606.ENSP00000300738	0.041	0	0	0	0.443	0	0	0.223	0.549
GMPS	HDAC3	9606.ENSP00000419851	9606.ENSP00000302967	0.071	0	0	0	0.068	0	0	0.297	0.338
GMPS	LDB2	9606.ENSP00000419851	9606.ENSP00000306772	0	0	0	0	0	0	0	0.187	0.187
GMPS	USP39	9606.ENSP00000419851	9606.ENSP00000312981	0	0	0	0	0.17	0	0	0	0.169
GMPS	ZFPM1	9606.ENSP00000419851	9606.ENSP00000326630	0	0	0	0	0	0.06	0	0.394	0.406
GMPS	PCIF1	9606.ENSP00000419851	9606.ENSP00000361486	0	0	0	0	0.259	0	0	0	0.259
GMPS	RPL10A	9606.ENSP00000419851	9606.ENSP00000363018	0	0	0	0	0.301	0	0	0	0.301
GMPS	SUGT1	9606.ENSP00000419851	9606.ENSP00000367208	0	0	0	0	0.143	0	0	0.067	0.166
GMPS	USP3	9606.ENSP00000419851	9606.ENSP00000369681	0	0	0	0	0.079	0	0	0.308	0.336
GMPS	RBM34	9606.ENSP00000419851	9606.ENSP00000386226	0	0	0	0	0.243	0	0	0.057	0.256
GMPS	LDB1	9606.ENSP00000419851	9606.ENSP00000392466	0	0	0	0	0	0	0	0.193	0.193
GMPS	RPL27	9606.ENSP00000419851	9606.ENSP00000464813	0	0	0	0	0.224	0	0	0	0.224
GMPS	TYW1B	9606.ENSP00000419851	9606.ENSP00000482502	0	0	0	0	0.233	0	0	0	0.232
GMPS	POLR2A	9606.ENSP00000419851	9606.ENSP00000480158	0	0	0	0	0.218	0	0	0.208	0.354
GPM6A	RPL10A	9606.ENSP00000280187	9606.ENSP00000363018	0	0	0	0	0	0	0	0.183	0.183
GPM6A	MFAP4	9606.ENSP00000280187	9606.ENSP00000378957	0	0	0	0	0.061	0	0	0.181	0.198
GPM6A	ZSCAN25	9606.ENSP00000280187	9606.ENSP00000377708	0	0	0	0	0	0	0	0.204	0.204
GPM6A	STOML3	9606.ENSP00000280187	9606.ENSP00000368952	0	0	0	0	0	0	0	0.215	0.215
GPM6A	TSC22D2	9606.ENSP00000280187	9606.ENSP00000354543	0	0	0	0	0	0	0	0.343	0.343
GPM6A	PCIF1	9606.ENSP00000280187	9606.ENSP00000361486	0	0	0	0	0	0	0	0.344	0.344
GPM6A	ZNF655	9606.ENSP00000280187	9606.ENSP00000393876	0	0	0	0	0	0	0	0.381	0.381
GPM6A	PSAPL1	9606.ENSP00000280187	9606.ENSP00000317445	0	0	0	0	0	0	0	0.474	0.474
GTF3C2	MNAT1	9606.ENSP00000352536	9606.ENSP00000261245	0	0	0	0	0.153	0	0	0	0.152
GTF3C2	ZNF335	9606.ENSP00000352536	9606.ENSP00000325326	0	0	0	0	0.052	0	0	0.379	0.386
GTF3C2	RSBN1L	9606.ENSP00000352536	9606.ENSP00000334040	0	0	0	0	0.173	0	0	0	0.173
GTF3C2	POLR2K	9606.ENSP00000352536	9606.ENSP00000342889	0	0	0	0	0	0	0.9	0	0.9
GTF3C2	ZNF512	9606.ENSP00000352536	9606.ENSP00000347648	0	0	0	0	0.052	0	0	0.546	0.551
GTF3C2	PLTP	9606.ENSP00000352536	9606.ENSP00000417138	0	0	0	0	0	0	0	0.159	0.159
GTF3C2	ZNF664	9606.ENSP00000352536	9606.ENSP00000441405	0	0	0	0	0.052	0	0	0.306	0.314
GTF3C2	PCIF1	9606.ENSP00000352536	9606.ENSP00000361486	0	0	0	0	0.131	0	0	0.291	0.357
HDAC3	TAF4	9606.ENSP00000302967	9606.ENSP00000252996	0	0	0	0	0.104	0.085	0	0.078	0.178
HDAC3	SETD7	9606.ENSP00000302967	9606.ENSP00000274031	0.043	0	0	0	0.062	0.185	0	0.236	0.366
HDAC3	MED1	9606.ENSP00000302967	9606.ENSP00000300651	0	0	0	0	0.054	0	0.9	0.269	0.924
HDAC3	USP39	9606.ENSP00000302967	9606.ENSP00000312981	0	0	0	0	0.065	0	0	0.13	0.153
HDAC3	ZSCAN25	9606.ENSP00000302967	9606.ENSP00000377708	0	0	0	0	0	0.157	0	0	0.156
HDAC3	ZNF335	9606.ENSP00000302967	9606.ENSP00000325326	0	0	0	0	0	0.157	0	0	0.156
HDAC3	ZNF664	9606.ENSP00000302967	9606.ENSP00000441405	0	0	0	0	0	0.157	0	0	0.156
HDAC3	ZNF655	9606.ENSP00000302967	9606.ENSP00000393876	0	0	0	0	0	0.157	0	0	0.156
HDAC3	ZNF473	9606.ENSP00000302967	9606.ENSP00000472808	0	0	0	0	0	0.157	0	0	0.156
HDAC3	ZNF512	9606.ENSP00000302967	9606.ENSP00000347648	0	0	0	0	0	0.157	0	0	0.156
HDAC3	ZFPM1	9606.ENSP00000302967	9606.ENSP00000326630	0	0	0	0	0	0.17	0	0.043	0.171
HDAC3	RPL10A	9606.ENSP00000302967	9606.ENSP00000363018	0	0	0	0	0.059	0.157	0	0	0.172
HDAC3	SUGT1	9606.ENSP00000302967	9606.ENSP00000367208	0	0	0	0	0.068	0.157	0	0.058	0.195
HDAC3	USP3	9606.ENSP00000302967	9606.ENSP00000369681	0	0	0	0	0.065	0.133	0	0.115	0.219
HDAC3	PDX1	9606.ENSP00000302967	9606.ENSP00000370421	0	0	0	0	0	0.186	0	0.08	0.219
HDAC3	PDS5B	9606.ENSP00000302967	9606.ENSP00000313851	0	0	0	0	0.087	0.169	0	0.097	0.255
HDAC3	PCIF1	9606.ENSP00000302967	9606.ENSP00000361486	0	0	0	0	0.051	0.379	0	0	0.386
HDAC3	TLE3	9606.ENSP00000302967	9606.ENSP00000452871	0	0	0	0	0.062	0.367	0	0.105	0.422
HDAC3	WDR73	9606.ENSP00000302967	9606.ENSP00000387982	0	0	0	0	0.088	0.349	0	0.184	0.473
HDAC3	POLR2K	9606.ENSP00000302967	9606.ENSP00000342889	0	0	0	0	0	0	0.9	0	0.9
HDAC3	ZNF521	9606.ENSP00000302967	9606.ENSP00000354794	0	0	0	0	0	0.263	0.9	0.096	0.927
HDAC3	POLR2A	9606.ENSP00000302967	9606.ENSP00000480158	0	0	0	0	0.097	0.185	0.9	0.268	0.938
HERC1	LMTK3	9606.ENSP00000390158	9606.ENSP00000270238	0	0	0	0	0	0	0	0.461	0.461
HERC1	HSPBAP1	9606.ENSP00000390158	9606.ENSP00000302562	0	0	0	0	0.061	0.177	0	0	0.194
HERC1	USP39	9606.ENSP00000390158	9606.ENSP00000312981	0	0	0	0	0.061	0	0	0.288	0.303
HERC1	RSBN1L	9606.ENSP00000390158	9606.ENSP00000334040	0	0	0	0	0.061	0	0	0.525	0.535
HERC1	ZNF521	9606.ENSP00000390158	9606.ENSP00000354794	0	0	0	0	0.055	0	0	0.155	0.168
HERC1	PCIF1	9606.ENSP00000390158	9606.ENSP00000361486	0	0	0	0	0.045	0	0	0.407	0.41
HERC1	PXDC1	9606.ENSP00000390158	9606.ENSP00000369636	0	0	0	0	0	0	0	0.365	0.365
HERC1	USP3	9606.ENSP00000390158	9606.ENSP00000369681	0	0	0	0	0.045	0	0	0.158	0.161
HERC1	HOOK2	9606.ENSP00000390158	9606.ENSP00000380785	0	0	0	0	0	0	0	0.37	0.37
HERC1	RBBP8	9606.ENSP00000390158	9606.ENSP00000382628	0	0	0	0	0	0	0	0.155	0.154
HERC1	SLC22A23	9606.ENSP00000390158	9606.ENSP00000385028	0	0	0	0	0	0	0	0.36	0.36
HERC1	STON2	9606.ENSP00000390158	9606.ENSP00000450857	0	0	0	0	0	0	0	0.253	0.253
HOOK2	LMTK3	9606.ENSP00000380785	9606.ENSP00000270238	0	0	0	0	0	0	0	0.703	0.703
HOOK2	USP39	9606.ENSP00000380785	9606.ENSP00000312981	0	0	0	0	0	0	0	0.209	0.209
HOOK2	RSBN1L	9606.ENSP00000380785	9606.ENSP00000334040	0	0	0	0	0	0	0	0.218	0.218
HOOK2	SEL1L	9606.ENSP00000380785	9606.ENSP00000337053	0	0	0	0	0	0	0	0.434	0.434
HOOK2	PCIF1	9606.ENSP00000380785	9606.ENSP00000361486	0	0	0	0	0	0	0	0.272	0.272
HOOK2	SUGT1	9606.ENSP00000380785	9606.ENSP00000367208	0	0	0	0	0	0	0	0.187	0.187
HOOK2	PXDC1	9606.ENSP00000380785	9606.ENSP00000369636	0	0	0	0	0	0	0	0.314	0.314
HOOK2	STON2	9606.ENSP00000380785	9606.ENSP00000450857	0	0	0	0	0	0	0	0.189	0.189
HOOK2	STIM1	9606.ENSP00000380785	9606.ENSP00000478059	0	0	0	0	0	0	0	0.227	0.227
HOOK2	SLC22A23	9606.ENSP00000380785	9606.ENSP00000385028	0	0	0	0	0	0	0	0.272	0.272
HSPBAP1	UTP18	9606.ENSP00000302562	9606.ENSP00000225298	0	0	0	0	0.063	0	0	0.165	0.184
HSPBAP1	RASGEF1B	9606.ENSP00000302562	9606.ENSP00000264400	0	0	0	0	0	0	0	0.228	0.227
HSPBAP1	TYW1B	9606.ENSP00000302562	9606.ENSP00000482502	0	0	0	0	0.064	0	0	0.197	0.216
HSPBAP1	PCIF1	9606.ENSP00000302562	9606.ENSP00000361486	0	0	0	0	0	0	0	0.283	0.282
HSPBAP1	SPOP	9606.ENSP00000302562	9606.ENSP00000377001	0	0	0	0	0.049	0	0	0.317	0.322
IQGAP1	KATNAL1	9606.ENSP00000268182	9606.ENSP00000369989	0	0	0	0	0	0.117	0	0.183	0.248
IQGAP1	PCIF1	9606.ENSP00000268182	9606.ENSP00000361486	0	0	0	0	0	0	0	0.261	0.261
ISX	RRM1	9606.ENSP00000311492	9606.ENSP00000300738	0	0	0	0	0.107	0	0	0.132	0.191
ISX	LDB2	9606.ENSP00000311492	9606.ENSP00000306772	0	0	0	0	0	0.339	0	0.063	0.354
ISX	TLE3	9606.ENSP00000311492	9606.ENSP00000452871	0	0	0	0	0	0.185	0	0.054	0.196
ISX	PCIF1	9606.ENSP00000311492	9606.ENSP00000361486	0	0	0	0	0	0.066	0	0.244	0.263
ISX	LDB1	9606.ENSP00000311492	9606.ENSP00000392466	0	0	0	0	0	0.339	0	0.063	0.354
KATNAL1	TAF4	9606.ENSP00000369989	9606.ENSP00000252996	0	0	0	0	0.131	0.058	0	0.117	0.214
KATNAL1	MED1	9606.ENSP00000369989	9606.ENSP00000300651	0	0	0	0	0.064	0	0	0.337	0.352
KATNAL1	SAMD9L	9606.ENSP00000369989	9606.ENSP00000326247	0	0	0	0	0	0	0	0.286	0.286
KATNAL1	PCIF1	9606.ENSP00000369989	9606.ENSP00000361486	0	0	0	0	0.1	0	0	0.565	0.592
KATNAL1	SUGT1	9606.ENSP00000369989	9606.ENSP00000367208	0	0	0	0	0.064	0.132	0	0.087	0.193
KATNAL1	USP3	9606.ENSP00000369989	9606.ENSP00000369681	0	0	0	0	0.129	0.131	0	0.049	0.217
KATNAL1	POLR2A	9606.ENSP00000369989	9606.ENSP00000480158	0	0	0	0	0	0.162	0	0.09	0.204
KATNAL1	MMS19	9606.ENSP00000369989	9606.ENSP00000412698	0	0	0	0	0	0.166	0	0.1	0.217
KATNAL1	SPOP	9606.ENSP00000369989	9606.ENSP00000377001	0	0	0	0	0.098	0.34	0	0.225	0.498
LDB1	MNAT1	9606.ENSP00000392466	9606.ENSP00000261245	0	0	0	0	0	0	0.9	0	0.9
LDB1	LDB2	9606.ENSP00000392466	9606.ENSP00000306772	0	0	0	0.977	0	0.731	0	0.803	0.735
LDB1	ZFPM1	9606.ENSP00000392466	9606.ENSP00000326630	0	0	0	0	0.084	0.08	0	0.709	0.733
LDB1	PCIF1	9606.ENSP00000392466	9606.ENSP00000361486	0	0	0	0	0	0	0	0.256	0.256
LDB1	PDX1	9606.ENSP00000392466	9606.ENSP00000370421	0	0	0	0	0	0.185	0	0.066	0.206
LDB1	RBBP8	9606.ENSP00000392466	9606.ENSP00000382628	0	0	0	0	0	0	0	0.547	0.547
LDB1	POLR2A	9606.ENSP00000392466	9606.ENSP00000480158	0	0	0	0	0.065	0	0	0.189	0.209
LDB1	TLE3	9606.ENSP00000392466	9606.ENSP00000452871	0	0	0	0	0.061	0.171	0.9	0.234	0.932
LDB2	MPHOSPH9	9606.ENSP00000306772	9606.ENSP00000475489	0	0	0	0	0	0	0	0.154	0.154
LDB2	ZNF521	9606.ENSP00000306772	9606.ENSP00000354794	0	0	0	0	0.139	0.08	0	0	0.174
LDB2	PDX1	9606.ENSP00000306772	9606.ENSP00000370421	0	0	0	0	0	0.185	0	0.05	0.192
LDB2	PCIF1	9606.ENSP00000306772	9606.ENSP00000361486	0	0	0	0	0	0	0	0.258	0.258
LDB2	TLE3	9606.ENSP00000306772	9606.ENSP00000452871	0	0	0	0	0.048	0.171	0	0.274	0.377
LDB2	RBBP8	9606.ENSP00000306772	9606.ENSP00000382628	0	0	0	0	0	0	0	0.527	0.527
LDB2	ZFPM1	9606.ENSP00000306772	9606.ENSP00000326630	0	0	0	0	0.056	0.08	0	0.664	0.683
LMTK3	SEL1L	9606.ENSP00000270238	9606.ENSP00000337053	0	0	0	0	0	0	0	0.162	0.162
LMTK3	RBBP8	9606.ENSP00000270238	9606.ENSP00000382628	0	0	0	0	0	0	0	0.167	0.167
LMTK3	ZNF521	9606.ENSP00000270238	9606.ENSP00000354794	0	0	0	0	0	0	0	0.183	0.183
LMTK3	USP39	9606.ENSP00000270238	9606.ENSP00000312981	0	0	0	0	0	0	0	0.305	0.305
LMTK3	RSBN1L	9606.ENSP00000270238	9606.ENSP00000334040	0	0	0	0	0	0	0	0.309	0.309
LMTK3	STON2	9606.ENSP00000270238	9606.ENSP00000450857	0	0	0	0	0	0	0	0.346	0.346
LMTK3	SLC22A23	9606.ENSP00000270238	9606.ENSP00000385028	0	0	0	0	0.077	0	0	0.355	0.379
LMTK3	PXDC1	9606.ENSP00000270238	9606.ENSP00000369636	0	0	0	0	0	0	0	0.412	0.412
LMTK3	PCIF1	9606.ENSP00000270238	9606.ENSP00000361486	0	0	0	0	0	0	0	0.436	0.436
MAP1S	ZHX3	9606.ENSP00000325313	9606.ENSP00000312222	0	0	0	0	0	0	0	0.196	0.196
MAP1S	ZNF335	9606.ENSP00000325313	9606.ENSP00000325326	0	0	0	0	0.062	0	0	0.214	0.231
MAP1S	PCIF1	9606.ENSP00000325313	9606.ENSP00000361486	0	0	0	0	0	0	0	0.24	0.239
MAP1S	MSANTD1	9606.ENSP00000325313	9606.ENSP00000411584	0	0	0	0	0	0	0	0.35	0.35
MAP1S	STK4	9606.ENSP00000325313	9606.ENSP00000361892	0	0	0	0	0.146	0.51	0	0	0.563
MED1	TRIP4	9606.ENSP00000300651	9606.ENSP00000261884	0	0	0	0	0.042	0.993	0	0.694	0.997
MED1	SETD7	9606.ENSP00000300651	9606.ENSP00000274031	0	0	0	0	0.062	0.387	0	0.186	0.491
MED1	ZNF473	9606.ENSP00000300651	9606.ENSP00000472808	0	0	0	0	0	0	0	0.151	0.15
MED1	TLE3	9606.ENSP00000300651	9606.ENSP00000452871	0	0	0	0	0.073	0	0	0.148	0.177
MED1	PDS5B	9606.ENSP00000300651	9606.ENSP00000313851	0	0	0	0	0.185	0	0	0	0.185
MED1	ZFPM1	9606.ENSP00000300651	9606.ENSP00000326630	0	0	0	0	0	0	0	0.311	0.311
MED1	PCIF1	9606.ENSP00000300651	9606.ENSP00000361486	0	0	0	0	0.122	0	0	0.505	0.547
MED1	POLR2A	9606.ENSP00000300651	9606.ENSP00000480158	0	0	0	0	0.118	0.742	0	0.542	0.887
METTL4	TRIP4	9606.ENSP00000458290	9606.ENSP00000261884	0	0	0	0	0	0	0	0.563	0.563
METTL4	PCIF1	9606.ENSP00000458290	9606.ENSP00000361486	0	0	0	0	0	0	0	0.286	0.286
MFAP4	PSAPL1	9606.ENSP00000378957	9606.ENSP00000317445	0	0	0	0	0.062	0	0	0.453	0.465
MFAP4	TSC22D2	9606.ENSP00000378957	9606.ENSP00000354543	0	0	0	0	0	0	0	0.303	0.303
MFAP4	PCIF1	9606.ENSP00000378957	9606.ENSP00000361486	0	0	0	0	0	0	0	0.344	0.344
MFAP4	RPL10A	9606.ENSP00000378957	9606.ENSP00000363018	0	0	0	0	0	0	0	0.155	0.155
MFAP4	ZSCAN25	9606.ENSP00000378957	9606.ENSP00000377708	0	0	0	0	0	0	0	0.203	0.203
MFAP4	ZNF655	9606.ENSP00000378957	9606.ENSP00000393876	0	0	0	0	0	0	0	0.362	0.362
MMS19	UTP18	9606.ENSP00000412698	9606.ENSP00000225298	0	0	0	0	0.174	0	0	0	0.174
MMS19	MNAT1	9606.ENSP00000412698	9606.ENSP00000261245	0	0	0	0	0.094	0	0.9	0.694	0.969
MMS19	PDS5B	9606.ENSP00000412698	9606.ENSP00000313851	0	0	0	0	0.064	0	0	0.405	0.42
MMS19	PCIF1	9606.ENSP00000412698	9606.ENSP00000361486	0	0	0	0	0.259	0	0	0	0.258
MMS19	POLR2A	9606.ENSP00000412698	9606.ENSP00000480158	0	0	0	0	0.114	0.167	0	0.093	0.272
MNAT1	TAF4	9606.ENSP00000261245	9606.ENSP00000252996	0	0	0	0	0.075	0	0.9	0.067	0.906
MNAT1	SUGT1	9606.ENSP00000261245	9606.ENSP00000367208	0	0	0	0	0.209	0	0	0	0.209
MNAT1	RBBP8	9606.ENSP00000261245	9606.ENSP00000382628	0	0	0	0	0.098	0	0	0.22	0.267
MNAT1	PCIF1	9606.ENSP00000261245	9606.ENSP00000361486	0	0	0	0	0.063	0.4	0	0	0.413
MNAT1	TRIP4	9606.ENSP00000261245	9606.ENSP00000261884	0	0	0	0	0.066	0	0	0.633	0.643
MNAT1	POLR2K	9606.ENSP00000261245	9606.ENSP00000342889	0	0	0	0	0.084	0.651	0.9	0.092	0.967
MNAT1	POLR2A	9606.ENSP00000261245	9606.ENSP00000480158	0	0	0	0	0.069	0.763	0.9	0.452	0.986
MPHOSPH9	ZFPM1	9606.ENSP00000475489	9606.ENSP00000326630	0	0	0	0	0	0	0	0.211	0.211
MPHOSPH9	PCIF1	9606.ENSP00000475489	9606.ENSP00000361486	0	0	0	0	0	0	0	0.421	0.42
MPHOSPH9	NFIX	9606.ENSP00000475489	9606.ENSP00000380781	0	0	0	0	0	0	0	0.269	0.269
MPHOSPH9	WDR73	9606.ENSP00000475489	9606.ENSP00000387982	0	0	0	0	0.061	0.13	0	0.062	0.166
MPHOSPH9	PLTP	9606.ENSP00000475489	9606.ENSP00000417138	0	0	0	0	0	0	0	0.172	0.171
MSANTD1	ZHX3	9606.ENSP00000411584	9606.ENSP00000312222	0	0	0	0	0	0	0	0.405	0.405
MSANTD1	PDS5B	9606.ENSP00000411584	9606.ENSP00000313851	0	0	0	0	0	0	0	0.25	0.25
MSANTD1	ZNF335	9606.ENSP00000411584	9606.ENSP00000325326	0	0	0	0	0	0.076	0	0.425	0.446
MSANTD1	PCIF1	9606.ENSP00000411584	9606.ENSP00000361486	0	0	0	0	0	0	0	0.446	0.446
MSANTD1	STOML1	9606.ENSP00000411584	9606.ENSP00000442478	0	0	0	0	0	0	0	0.224	0.224
MYADM	TAF4	9606.ENSP00000375649	9606.ENSP00000252996	0	0	0	0	0	0	0	0.289	0.289
MYADM	POLR2K	9606.ENSP00000375649	9606.ENSP00000342889	0	0	0	0	0	0	0	0.402	0.402
MYADM	PCIF1	9606.ENSP00000375649	9606.ENSP00000361486	0	0	0	0	0	0	0	0.286	0.286
NFIX	POLR2K	9606.ENSP00000380781	9606.ENSP00000342889	0	0	0	0	0	0	0.9	0	0.9
NFIX	TSC22D2	9606.ENSP00000380781	9606.ENSP00000354543	0	0	0	0	0	0	0	0.266	0.266
NFIX	PCIF1	9606.ENSP00000380781	9606.ENSP00000361486	0	0	0	0	0	0	0	0.266	0.266
OLFM4	STON2	9606.ENSP00000219022	9606.ENSP00000450857	0	0	0	0	0	0	0	0.247	0.247
OLFM4	RSBN1L	9606.ENSP00000219022	9606.ENSP00000334040	0	0	0	0	0	0	0	0.325	0.325
OLFM4	PXDC1	9606.ENSP00000219022	9606.ENSP00000369636	0	0	0	0	0	0	0	0.327	0.327
OLFM4	SLC22A23	9606.ENSP00000219022	9606.ENSP00000385028	0	0	0	0	0	0.106	0	0.285	0.334
OLFM4	PCIF1	9606.ENSP00000219022	9606.ENSP00000361486	0	0	0	0	0	0	0	0.354	0.354
PCIF1	UTP18	9606.ENSP00000361486	9606.ENSP00000225298	0	0	0	0	0.359	0	0	0	0.359
PCIF1	TAF4	9606.ENSP00000361486	9606.ENSP00000252996	0	0	0	0	0.114	0	0	0.187	0.249
PCIF1	TRIP4	9606.ENSP00000361486	9606.ENSP00000261884	0	0	0	0	0.066	0	0	0.254	0.273
PCIF1	RASGEF1B	9606.ENSP00000361486	9606.ENSP00000264400	0	0	0	0	0.063	0	0	0.285	0.301
PCIF1	SETD7	9606.ENSP00000361486	9606.ENSP00000274031	0	0	0	0	0.068	0	0	0.22	0.242
PCIF1	SLC22A3	9606.ENSP00000361486	9606.ENSP00000275300	0	0	0	0	0	0	0	0.411	0.411
PCIF1	RRM1	9606.ENSP00000361486	9606.ENSP00000300738	0	0	0	0	0	0	0	0.392	0.392
PCIF1	ZHX3	9606.ENSP00000361486	9606.ENSP00000312222	0	0	0	0	0	0	0	0.285	0.284
PCIF1	USP39	9606.ENSP00000361486	9606.ENSP00000312981	0	0	0	0	0.104	0	0	0.227	0.279
PCIF1	PDS5B	9606.ENSP00000361486	9606.ENSP00000313851	0	0	0	0	0.137	0	0	0.162	0.246
PCIF1	PSAPL1	9606.ENSP00000361486	9606.ENSP00000317445	0	0	0	0	0	0	0	0.663	0.663
PCIF1	ZNF335	9606.ENSP00000361486	9606.ENSP00000325326	0	0	0	0	0.064	0	0	0.537	0.548
PCIF1	SAMD9L	9606.ENSP00000361486	9606.ENSP00000326247	0	0	0	0	0	0	0	0.244	0.243
PCIF1	ZFPM1	9606.ENSP00000361486	9606.ENSP00000326630	0	0	0	0	0	0	0	0.267	0.267
PCIF1	RSBN1L	9606.ENSP00000361486	9606.ENSP00000334040	0	0	0	0	0.099	0	0	0.602	0.626
PCIF1	SEL1L	9606.ENSP00000361486	9606.ENSP00000337053	0	0	0	0	0	0	0	0.404	0.404
PCIF1	POLR2K	9606.ENSP00000361486	9606.ENSP00000342889	0	0	0	0	0.064	0	0	0.268	0.285
PCIF1	ZNF512	9606.ENSP00000361486	9606.ENSP00000347648	0	0	0	0	0	0	0	0.312	0.311
PCIF1	TSC22D2	9606.ENSP00000361486	9606.ENSP00000354543	0	0	0	0	0	0	0	0.557	0.557
PCIF1	ZNF521	9606.ENSP00000361486	9606.ENSP00000354794	0	0	0	0	0	0	0	0.459	0.459
PCIF1	SPANXA2	9606.ENSP00000361486	9606.ENSP00000359549	0	0	0	0	0	0	0	0.246	0.245
PCIF1	SPANXA1	9606.ENSP00000361486	9606.ENSP00000359550	0	0	0	0	0	0	0	0.244	0.243
PCIF1	TYW1B	9606.ENSP00000361486	9606.ENSP00000482502	0	0	0	0	0.077	0	0	0.214	0.243
PCIF1	USP3	9606.ENSP00000361486	9606.ENSP00000369681	0	0	0	0	0.131	0	0	0.172	0.249
PCIF1	SUGT1	9606.ENSP00000361486	9606.ENSP00000367208	0	0	0	0	0.064	0	0	0.245	0.263
PCIF1	STIM1	9606.ENSP00000361486	9606.ENSP00000478059	0	0	0	0	0	0	0	0.267	0.267
PCIF1	ZSCAN25	9606.ENSP00000361486	9606.ENSP00000377708	0	0	0	0	0	0	0	0.271	0.271
PCIF1	STOML3	9606.ENSP00000361486	9606.ENSP00000368952	0	0	0	0	0.061	0	0	0.257	0.273
PCIF1	TLE3	9606.ENSP00000361486	9606.ENSP00000452871	0	0	0	0	0	0	0	0.276	0.276
PCIF1	RPL27	9606.ENSP00000361486	9606.ENSP00000464813	0	0	0	0	0	0	0	0.285	0.285
PCIF1	RPL10A	9606.ENSP00000361486	9606.ENSP00000363018	0	0	0	0	0.061	0	0	0.299	0.314
PCIF1	ZNF664	9606.ENSP00000361486	9606.ENSP00000441405	0	0	0	0	0	0	0	0.33	0.33
PCIF1	STOML1	9606.ENSP00000361486	9606.ENSP00000442478	0	0	0	0	0.061	0	0	0.33	0.343
PCIF1	SPOP	9606.ENSP00000361486	9606.ENSP00000377001	0	0	0	0	0	0	0	0.358	0.358
PCIF1	STK4	9606.ENSP00000361486	9606.ENSP00000361892	0	0	0	0	0	0	0	0.376	0.376
PCIF1	POLR2A	9606.ENSP00000361486	9606.ENSP00000480158	0	0	0	0	0.079	0.379	0	0	0.403
PCIF1	ZNF473	9606.ENSP00000361486	9606.ENSP00000472808	0	0	0	0	0	0	0	0.405	0.405
PCIF1	WDR73	9606.ENSP00000361486	9606.ENSP00000387982	0	0	0	0	0	0	0	0.406	0.406
PCIF1	PLTP	9606.ENSP00000361486	9606.ENSP00000417138	0	0	0	0	0	0	0	0.448	0.448
PCIF1	RBBP8	9606.ENSP00000361486	9606.ENSP00000382628	0	0	0	0	0	0	0	0.461	0.461
PCIF1	RBM34	9606.ENSP00000361486	9606.ENSP00000386226	0	0	0	0	0.046	0	0	0.495	0.497
PCIF1	ZNF655	9606.ENSP00000361486	9606.ENSP00000393876	0	0	0	0	0	0	0	0.529	0.529
PCIF1	STON2	9606.ENSP00000361486	9606.ENSP00000450857	0	0	0	0	0	0	0	0.563	0.563
PCIF1	SLC22A23	9606.ENSP00000361486	9606.ENSP00000385028	0	0	0	0	0	0	0	0.633	0.633
PCIF1	PDX1	9606.ENSP00000361486	9606.ENSP00000370421	0	0	0	0	0	0.472	0	0.357	0.646
PCIF1	PXDC1	9606.ENSP00000361486	9606.ENSP00000369636	0	0	0	0	0	0	0	0.669	0.669
PDS5B	RRM1	9606.ENSP00000313851	9606.ENSP00000300738	0	0	0	0	0.17	0	0	0.086	0.208
PDS5B	USP39	9606.ENSP00000313851	9606.ENSP00000312981	0	0	0	0	0.171	0	0	0	0.171
PDS5B	ZNF335	9606.ENSP00000313851	9606.ENSP00000325326	0	0	0	0	0	0	0	0.163	0.163
PDS5B	ZNF512	9606.ENSP00000313851	9606.ENSP00000347648	0	0	0	0	0	0	0	0.163	0.163
PDS5B	RBBP8	9606.ENSP00000313851	9606.ENSP00000382628	0	0	0	0	0	0	0	0.235	0.235
PDS5B	POLR2A	9606.ENSP00000313851	9606.ENSP00000480158	0	0	0	0	0.157	0	0	0.143	0.247
PDX1	TLE3	9606.ENSP00000370421	9606.ENSP00000452871	0	0	0	0	0	0.127	0	0.069	0.153
PDX1	POLR2A	9606.ENSP00000370421	9606.ENSP00000480158	0	0	0	0	0	0	0	0.29	0.29
PDX1	SPOP	9606.ENSP00000370421	9606.ENSP00000377001	0	0	0	0	0	0.447	0	0	0.447
PLTP	ZNF335	9606.ENSP00000417138	9606.ENSP00000325326	0	0	0	0	0	0	0	0.286	0.286
PLTP	RPL10A	9606.ENSP00000417138	9606.ENSP00000363018	0	0	0	0	0	0	0	0.155	0.155
PLTP	ZNF664	9606.ENSP00000417138	9606.ENSP00000441405	0	0	0	0	0	0	0	0.326	0.325
PLTP	TYW1B	9606.ENSP00000417138	9606.ENSP00000482502	0	0	0	0	0	0	0	0.446	0.446
POLR2A	UTP18	9606.ENSP00000480158	9606.ENSP00000225298	0	0	0	0	0.321	0	0	0	0.321
POLR2A	TAF4	9606.ENSP00000480158	9606.ENSP00000252996	0	0	0	0	0.111	0	0.9	0.227	0.925
POLR2A	TRIP4	9606.ENSP00000480158	9606.ENSP00000261884	0	0	0	0	0.064	0.993	0	0	0.993
POLR2A	SETD7	9606.ENSP00000480158	9606.ENSP00000274031	0	0	0	0	0.061	0.195	0	0.261	0.392
POLR2A	RRM1	9606.ENSP00000480158	9606.ENSP00000300738	0	0	0	0	0.087	0	0	0.181	0.22
POLR2A	USP39	9606.ENSP00000480158	9606.ENSP00000312981	0	0	0	0	0.079	0	0.9	0	0.903
POLR2A	SEL1L	9606.ENSP00000480158	9606.ENSP00000337053	0	0.191	0	0	0.061	0	0	0.085	0.245
POLR2A	POLR2K	9606.ENSP00000480158	9606.ENSP00000342889	0	0	0	0	0.061	0.999	0.9	0.923	0.999
POLR2A	RPL10A	9606.ENSP00000480158	9606.ENSP00000363018	0.111	0	0	0	0.183	0	0	0.243	0.403
POLR2A	SUGT1	9606.ENSP00000480158	9606.ENSP00000367208	0	0	0	0	0.07	0.171	0	0.075	0.225
POLR2A	USP3	9606.ENSP00000480158	9606.ENSP00000369681	0	0	0	0	0.066	0.18	0	0.094	0.246
POLR2A	RBBP8	9606.ENSP00000480158	9606.ENSP00000382628	0	0	0	0	0	0	0	0.187	0.187
POLR2A	RBM34	9606.ENSP00000480158	9606.ENSP00000386226	0	0	0	0	0.107	0.132	0	0.092	0.235
POLR2A	TLE3	9606.ENSP00000480158	9606.ENSP00000452871	0	0	0	0	0.082	0	0	0.136	0.173
POLR2A	RPL27	9606.ENSP00000480158	9606.ENSP00000464813	0.06	0	0	0	0.066	0	0	0.254	0.289
POLR2K	TAF4	9606.ENSP00000342889	9606.ENSP00000252996	0	0	0	0	0	0	0.9	0.324	0.929
POLR2K	RRM1	9606.ENSP00000342889	9606.ENSP00000300738	0	0	0	0	0.065	0	0	0.186	0.206
POLR2K	USP39	9606.ENSP00000342889	9606.ENSP00000312981	0	0	0	0	0	0	0.9	0	0.9
POLR2K	RPL27	9606.ENSP00000342889	9606.ENSP00000464813	0	0	0	0	0.171	0	0	0	0.171
POLR2K	RPL10A	9606.ENSP00000342889	9606.ENSP00000363018	0	0	0	0	0.171	0	0	0	0.171
PSAPL1	RPL27	9606.ENSP00000317445	9606.ENSP00000464813	0	0	0	0	0	0	0	0.347	0.347
PSAPL1	ZSCAN25	9606.ENSP00000317445	9606.ENSP00000377708	0	0	0	0	0	0	0	0.423	0.422
PSAPL1	RPL10A	9606.ENSP00000317445	9606.ENSP00000363018	0	0	0	0	0	0	0	0.461	0.461
PSAPL1	TSC22D2	9606.ENSP00000317445	9606.ENSP00000354543	0	0	0	0	0	0	0	0.649	0.649
PSAPL1	ZNF655	9606.ENSP00000317445	9606.ENSP00000393876	0	0	0	0	0	0	0	0.702	0.702
PXDC1	SLC22A3	9606.ENSP00000369636	9606.ENSP00000275300	0	0	0	0	0.069	0	0	0.445	0.462
PXDC1	RRM1	9606.ENSP00000369636	9606.ENSP00000300738	0	0	0	0	0	0	0	0.397	0.397
PXDC1	USP39	9606.ENSP00000369636	9606.ENSP00000312981	0	0	0	0	0	0	0	0.263	0.263
PXDC1	RSBN1L	9606.ENSP00000369636	9606.ENSP00000334040	0	0	0	0	0	0	0	0.736	0.736
PXDC1	SEL1L	9606.ENSP00000369636	9606.ENSP00000337053	0	0	0	0	0	0	0	0.468	0.468
PXDC1	ZNF521	9606.ENSP00000369636	9606.ENSP00000354794	0	0	0	0	0	0	0	0.463	0.463
PXDC1	SUGT1	9606.ENSP00000369636	9606.ENSP00000367208	0	0	0	0	0	0	0	0.349	0.349
PXDC1	STOML3	9606.ENSP00000369636	9606.ENSP00000368952	0	0	0	0	0	0	0	0.348	0.347
PXDC1	USP3	9606.ENSP00000369636	9606.ENSP00000369681	0	0	0	0	0	0	0	0.268	0.268
PXDC1	STIM1	9606.ENSP00000369636	9606.ENSP00000478059	0	0	0	0	0	0	0	0.277	0.277
PXDC1	RBBP8	9606.ENSP00000369636	9606.ENSP00000382628	0	0	0	0	0	0	0	0.488	0.488
PXDC1	STON2	9606.ENSP00000369636	9606.ENSP00000450857	0	0	0	0	0	0	0	0.596	0.596
PXDC1	SLC22A23	9606.ENSP00000369636	9606.ENSP00000385028	0	0	0	0	0	0	0	0.854	0.854
RASGEF1B	TRIP4	9606.ENSP00000264400	9606.ENSP00000261884	0	0	0	0	0	0	0	0.353	0.353
RBBP8	SLC22A3	9606.ENSP00000382628	9606.ENSP00000275300	0	0	0	0	0	0	0	0.161	0.161
RBBP8	RRM1	9606.ENSP00000382628	9606.ENSP00000300738	0	0	0	0	0.111	0	0	0.182	0.241
RBBP8	ZFPM1	9606.ENSP00000382628	9606.ENSP00000326630	0	0	0	0	0	0.261	0	0	0.261
RBBP8	RSBN1L	9606.ENSP00000382628	9606.ENSP00000334040	0	0	0	0	0	0	0	0.225	0.225
RBBP8	SEL1L	9606.ENSP00000382628	9606.ENSP00000337053	0	0	0	0	0	0	0	0.178	0.178
RBBP8	ZNF521	9606.ENSP00000382628	9606.ENSP00000354794	0	0	0	0	0	0.05	0	0.185	0.192
RBBP8	USP3	9606.ENSP00000382628	9606.ENSP00000369681	0	0	0	0	0	0	0	0.231	0.23
RBBP8	STON2	9606.ENSP00000382628	9606.ENSP00000450857	0	0	0	0	0	0	0	0.381	0.381
RBBP8	SLC22A23	9606.ENSP00000382628	9606.ENSP00000385028	0	0	0	0	0	0	0	0.431	0.431
RBM34	UTP18	9606.ENSP00000386226	9606.ENSP00000225298	0	0	0	0	0.508	0.05	0	0.052	0.518
RBM34	RRM1	9606.ENSP00000386226	9606.ENSP00000300738	0	0	0	0	0.152	0	0	0.05	0.16
RBM34	ZNF512	9606.ENSP00000386226	9606.ENSP00000347648	0	0	0	0	0	0.521	0	0	0.521
RBM34	RPL10A	9606.ENSP00000386226	9606.ENSP00000363018	0	0	0	0	0.064	0.475	0	0.049	0.492
RBM34	SUGT1	9606.ENSP00000386226	9606.ENSP00000367208	0	0	0	0	0.127	0.084	0	0.086	0.206
RBM34	ZSCAN25	9606.ENSP00000386226	9606.ENSP00000377708	0	0	0	0	0	0.216	0	0	0.216
RBM34	ZNF473	9606.ENSP00000386226	9606.ENSP00000472808	0	0	0	0	0	0.064	0	0.331	0.347
RBM34	STOML1	9606.ENSP00000386226	9606.ENSP00000442478	0	0	0	0	0	0	0	0.714	0.714
RBM34	WDR73	9606.ENSP00000386226	9606.ENSP00000387982	0	0	0	0	0.061	0	0	0.733	0.739
RPL10A	TSC22D2	9606.ENSP00000363018	9606.ENSP00000354543	0	0	0	0	0	0	0	0.294	0.294
RPL10A	ZSCAN25	9606.ENSP00000363018	9606.ENSP00000377708	0	0	0	0	0	0	0	0.204	0.204
RPL10A	ZNF655	9606.ENSP00000363018	9606.ENSP00000393876	0	0	0	0	0	0	0	0.364	0.364
RPL10A	RPL27	9606.ENSP00000363018	9606.ENSP00000464813	0	0	0	0	0.996	0.992	0.9	0.557	0.999
RPL27	UTP18	9606.ENSP00000464813	9606.ENSP00000225298	0	0	0	0	0.205	0	0	0	0.205
RPL27	TSC22D2	9606.ENSP00000464813	9606.ENSP00000354543	0	0	0	0	0	0	0	0.23	0.23
RPL27	ZNF655	9606.ENSP00000464813	9606.ENSP00000393876	0	0	0	0	0	0.063	0	0.233	0.25
RRM1	UTP18	9606.ENSP00000300738	9606.ENSP00000225298	0	0	0	0	0.171	0	0	0	0.171
RRM1	SETD7	9606.ENSP00000300738	9606.ENSP00000274031	0	0	0	0	0.084	0.157	0	0	0.194
RRM1	SEL1L	9606.ENSP00000300738	9606.ENSP00000337053	0	0	0	0	0.064	0	0	0.142	0.163
RRM1	ZNF521	9606.ENSP00000300738	9606.ENSP00000354794	0	0	0	0	0.062	0	0	0.162	0.181
RRM1	RSBN1L	9606.ENSP00000300738	9606.ENSP00000334040	0	0	0	0	0	0	0	0.258	0.258
RRM1	STON2	9606.ENSP00000300738	9606.ENSP00000450857	0	0	0	0	0	0	0	0.318	0.318
RRM1	TLE3	9606.ENSP00000300738	9606.ENSP00000452871	0	0	0	0	0.048	0	0	0.359	0.363
RRM1	SLC22A23	9606.ENSP00000300738	9606.ENSP00000385028	0	0	0	0	0	0	0	0.389	0.389
RRM1	WDR73	9606.ENSP00000300738	9606.ENSP00000387982	0	0	0	0	0.461	0	0	0	0.461
RRM1	STIM1	9606.ENSP00000300738	9606.ENSP00000478059	0	0	0	0	0	0	0	0.765	0.765
RSBN1L	SLC22A3	9606.ENSP00000334040	9606.ENSP00000275300	0	0	0	0	0	0	0	0.158	0.158
RSBN1L	USP39	9606.ENSP00000334040	9606.ENSP00000312981	0	0	0	0	0	0	0	0.18	0.18
RSBN1L	STIM1	9606.ENSP00000334040	9606.ENSP00000478059	0	0	0	0	0	0	0	0.234	0.234
RSBN1L	SEL1L	9606.ENSP00000334040	9606.ENSP00000337053	0	0	0	0	0	0	0	0.35	0.35
RSBN1L	USP3	9606.ENSP00000334040	9606.ENSP00000369681	0	0	0	0	0.071	0	0	0.35	0.37
RSBN1L	STOML3	9606.ENSP00000334040	9606.ENSP00000368952	0	0	0	0	0	0	0	0.429	0.429
RSBN1L	SUGT1	9606.ENSP00000334040	9606.ENSP00000367208	0	0	0	0	0.065	0	0	0.44	0.454
RSBN1L	ZNF521	9606.ENSP00000334040	9606.ENSP00000354794	0	0	0	0	0	0	0	0.477	0.477
RSBN1L	STON2	9606.ENSP00000334040	9606.ENSP00000450857	0	0	0	0	0	0	0	0.5	0.5
RSBN1L	SLC22A23	9606.ENSP00000334040	9606.ENSP00000385028	0	0	0	0	0	0	0	0.727	0.727
SEL1L	SLC22A3	9606.ENSP00000337053	9606.ENSP00000275300	0	0	0	0	0	0	0	0.153	0.153
SEL1L	STOML3	9606.ENSP00000337053	9606.ENSP00000368952	0	0	0	0	0.063	0	0	0.135	0.155
SEL1L	ZNF521	9606.ENSP00000337053	9606.ENSP00000354794	0	0	0	0	0	0.048	0	0.21	0.216
SEL1L	SUGT1	9606.ENSP00000337053	9606.ENSP00000367208	0	0	0	0	0.064	0	0	0.232	0.25
SEL1L	SLC22A23	9606.ENSP00000337053	9606.ENSP00000385028	0	0	0	0	0	0	0	0.403	0.403
SEL1L	STON2	9606.ENSP00000337053	9606.ENSP00000450857	0	0	0	0	0	0	0	0.437	0.437
SETD7	SPOP	9606.ENSP00000274031	9606.ENSP00000377001	0	0	0	0	0.055	0.088	0	0.095	0.151
SETD7	ZSCAN25	9606.ENSP00000274031	9606.ENSP00000377708	0	0	0	0	0.051	0.164	0	0	0.172
SETD7	ZFPM1	9606.ENSP00000274031	9606.ENSP00000326630	0	0	0	0	0.051	0.164	0	0	0.172
SETD7	ZNF335	9606.ENSP00000274031	9606.ENSP00000325326	0	0	0	0	0.051	0.164	0	0	0.172
SETD7	ZNF521	9606.ENSP00000274031	9606.ENSP00000354794	0	0	0	0	0.051	0.164	0	0	0.172
SETD7	ZNF664	9606.ENSP00000274031	9606.ENSP00000441405	0	0	0	0	0.051	0.164	0	0	0.172
SETD7	ZNF655	9606.ENSP00000274031	9606.ENSP00000393876	0	0	0	0	0.051	0.164	0	0	0.172
SETD7	ZNF473	9606.ENSP00000274031	9606.ENSP00000472808	0	0	0	0	0.051	0.164	0	0	0.172
SETD7	ZNF512	9606.ENSP00000274031	9606.ENSP00000347648	0	0	0	0	0.051	0.164	0	0	0.172
SETD7	WDR73	9606.ENSP00000274031	9606.ENSP00000387982	0	0	0	0	0.061	0.413	0	0.144	0.486
SLC22A23	SLC22A3	9606.ENSP00000385028	9606.ENSP00000275300	0	0	0	0.632	0	0	0	0.55	0.228
SLC22A23	USP39	9606.ENSP00000385028	9606.ENSP00000312981	0	0	0	0	0	0	0	0.214	0.214
SLC22A23	ZNF521	9606.ENSP00000385028	9606.ENSP00000354794	0	0	0	0	0	0	0	0.47	0.47
SLC22A23	SUGT1	9606.ENSP00000385028	9606.ENSP00000367208	0	0	0	0	0	0.05	0	0.302	0.309
SLC22A23	STOML3	9606.ENSP00000385028	9606.ENSP00000368952	0	0	0	0	0.055	0	0	0.296	0.306
SLC22A23	USP3	9606.ENSP00000385028	9606.ENSP00000369681	0	0	0	0	0	0	0	0.233	0.232
SLC22A23	STIM1	9606.ENSP00000385028	9606.ENSP00000478059	0	0	0	0	0	0	0	0.276	0.276
SLC22A23	STON2	9606.ENSP00000385028	9606.ENSP00000450857	0	0	0	0	0	0	0	0.56	0.56
SLC22A3	ZNF521	9606.ENSP00000275300	9606.ENSP00000354794	0	0	0	0	0	0	0	0.171	0.171
SLC22A3	STON2	9606.ENSP00000275300	9606.ENSP00000450857	0	0	0	0	0	0	0	0.28	0.28
SPANXA1	ZNF335	9606.ENSP00000359550	9606.ENSP00000325326	0	0	0	0	0	0	0	0.214	0.214
SPANXA1	SPANXA2	9606.ENSP00000359550	9606.ENSP00000359549	0	0	0	0.983	0.771	0	0	0	0.771
SPANXA1	TYW1B	9606.ENSP00000359550	9606.ENSP00000482502	0	0	0	0	0	0	0	0.151	0.15
SPANXA2	ZNF335	9606.ENSP00000359549	9606.ENSP00000325326	0	0	0	0	0	0	0	0.216	0.216
SPANXA2	TYW1B	9606.ENSP00000359549	9606.ENSP00000482502	0	0	0	0	0	0	0	0.16	0.159
STIM1	STON2	9606.ENSP00000478059	9606.ENSP00000450857	0	0	0	0	0	0	0	0.242	0.242
STK4	ZNF335	9606.ENSP00000361892	9606.ENSP00000325326	0	0	0	0	0.057	0.057	0	0.127	0.155
STK4	TSC22D2	9606.ENSP00000361892	9606.ENSP00000354543	0	0	0	0	0	0.175	0	0	0.175
STOML1	STOML3	9606.ENSP00000442478	9606.ENSP00000368952	0	0	0.44	0.775	0.063	0	0	0.683	0.278
STOML1	WDR73	9606.ENSP00000442478	9606.ENSP00000387982	0	0	0	0	0.063	0	0	0.723	0.73
STOML1	ZNF473	9606.ENSP00000442478	9606.ENSP00000472808	0	0	0	0	0.062	0.05	0	0.201	0.225
STOML3	USP39	9606.ENSP00000368952	9606.ENSP00000312981	0	0	0	0	0.062	0	0	0.187	0.204
STOML3	TSC22D2	9606.ENSP00000368952	9606.ENSP00000354543	0	0	0	0	0	0	0	0.355	0.355
STOML3	ZNF521	9606.ENSP00000368952	9606.ENSP00000354794	0	0	0	0	0	0.05	0	0.146	0.154
STOML3	SUGT1	9606.ENSP00000368952	9606.ENSP00000367208	0	0	0	0	0.062	0.068	0	0.199	0.239
STOML3	STON2	9606.ENSP00000368952	9606.ENSP00000450857	0	0	0	0	0.062	0	0	0.186	0.203
STON2	USP39	9606.ENSP00000450857	9606.ENSP00000312981	0	0	0	0	0.062	0	0	0.144	0.163
STON2	ZNF521	9606.ENSP00000450857	9606.ENSP00000354794	0	0	0	0	0	0	0	0.418	0.418
STON2	SUGT1	9606.ENSP00000450857	9606.ENSP00000367208	0	0	0	0	0	0	0	0.187	0.187
SUGT1	ZNF521	9606.ENSP00000367208	9606.ENSP00000354794	0	0	0	0	0	0.064	0	0.149	0.169
TAF4	TLE3	9606.ENSP00000252996	9606.ENSP00000452871	0	0	0	0	0.111	0	0	0.087	0.154
TLE3	USP3	9606.ENSP00000452871	9606.ENSP00000369681	0	0	0	0	0.068	0.186	0	0	0.209
TRIP4	USP3	9606.ENSP00000261884	9606.ENSP00000369681	0	0	0	0	0	0	0	0.176	0.176
TSC22D2	ZSCAN25	9606.ENSP00000354543	9606.ENSP00000377708	0	0	0	0	0	0.05	0	0.319	0.325
TSC22D2	ZNF664	9606.ENSP00000354543	9606.ENSP00000441405	0	0	0	0	0	0.05	0	0.501	0.505
TSC22D2	ZNF655	9606.ENSP00000354543	9606.ENSP00000393876	0	0	0	0	0	0.05	0	0.563	0.567
TYW1B	UTP18	9606.ENSP00000482502	9606.ENSP00000225298	0	0	0	0	0.308	0	0	0	0.307
TYW1B	ZNF335	9606.ENSP00000482502	9606.ENSP00000325326	0	0	0	0	0	0	0	0.197	0.197
USP3	USP39	9606.ENSP00000369681	9606.ENSP00000312981	0	0	0	0.604	0.092	0	0	0.665	0.326
WDR73	ZNF335	9606.ENSP00000387982	9606.ENSP00000325326	0	0	0	0	0	0.186	0	0	0.186
WDR73	ZFPM1	9606.ENSP00000387982	9606.ENSP00000326630	0	0	0	0	0	0.186	0	0	0.186
WDR73	ZNF512	9606.ENSP00000387982	9606.ENSP00000347648	0	0	0	0	0	0.186	0	0	0.186
WDR73	ZNF521	9606.ENSP00000387982	9606.ENSP00000354794	0	0	0	0	0	0.186	0	0	0.186
WDR73	ZSCAN25	9606.ENSP00000387982	9606.ENSP00000377708	0	0	0	0	0	0.186	0	0	0.186
WDR73	ZNF655	9606.ENSP00000387982	9606.ENSP00000393876	0	0	0	0	0	0.186	0	0	0.186
WDR73	ZNF664	9606.ENSP00000387982	9606.ENSP00000441405	0	0	0	0	0	0.186	0	0	0.186
WDR73	ZNF473	9606.ENSP00000387982	9606.ENSP00000472808	0	0	0	0	0	0.186	0	0.242	0.356
ZFPM1	ZNF521	9606.ENSP00000326630	9606.ENSP00000354794	0	0	0	0	0	0	0	0.273	0.273
ZHX3	ZNF335	9606.ENSP00000312222	9606.ENSP00000325326	0	0	0	0	0	0	0	0.263	0.263
ZNF335	ZNF664	9606.ENSP00000325326	9606.ENSP00000441405	0	0	0	0.698	0	0	0	0.477	0.172
ZNF335	ZNF512	9606.ENSP00000325326	9606.ENSP00000347648	0	0	0	0	0	0	0	0.344	0.344
ZNF512	ZNF664	9606.ENSP00000347648	9606.ENSP00000441405	0	0	0	0	0	0	0	0.349	0.349
