# Supplementary material for: A Pan-Cancer Analysis of the Oncogenic and Immunogenic Role of m6Am Methyltransferase PCIF1
Source: Front Oncol. 2021 Nov 23;11:753393. doi: 10.3389/fonc.2021.753393 (PMC8650698; doi:10.3389/fonc.2021.753393)
Supplement: Supplementary file 5 [file Table_2.xlsx]

## Sheet: 工作表 1 - Table S4
Table S2. PCIF1 interacted proteins.
Gene Symbol	Gene ID	PCC
ZSWIM1	ENSG00000168612.4	0.55
UBOX5	ENSG00000185019.16	0.5
SLC35C2	ENSG00000080189.14	0.5
IFT52	ENSG00000101052.12	0.48
EHMT2	ENSG00000204371.11	0.47
GMEB2	ENSG00000101216.10	0.47
CIC	ENSG00000079432.7	0.47
RAB11B	ENSG00000185236.11	0.46
ZNF362	ENSG00000160094.14	0.46
NCOA5	ENSG00000124160.11	0.45
ZCCHC3	ENSG00000247315.3	0.45
HCFC1	ENSG00000172534.13	0.45
SOX12	ENSG00000177732.7	0.45
ZNF414	ENSG00000133250.13	0.45
DPF2	ENSG00000133884.9	0.45
SETD1A	ENSG00000099381.16	0.44
NELFA	ENSG00000185049.12	0.44
SLC41A3	ENSG00000114544.15	0.44
AAAS	ENSG00000094914.12	0.44
NPRL3	ENSG00000103148.15	0.43
ZNF777	ENSG00000196453.7	0.43
MED25	ENSG00000104973.14	0.43
RTFDC1	ENSG00000022277.12	0.43
PTPN23	ENSG00000076201.14	0.43
SAMD1	ENSG00000141858.11	0.43
IDH3B	ENSG00000101365.20	0.43
AP5S1	ENSG00000125843.10	0.43
MLLT1	ENSG00000130382.8	0.43
KAT8	ENSG00000103510.19	0.43
DVL2	ENSG00000004975.11	0.43
TBC1D10B	ENSG00000169221.13	0.43
DHX30	ENSG00000132153.14	0.43
AAR2	ENSG00000131043.11	0.43
ZMYM3	ENSG00000147130.14	0.43
ZNF865	ENSG00000261221.3	0.43
C14orf93	ENSG00000100802.14	0.43
TSPY26P	ENSG00000235217.6	0.43
ACOT8	ENSG00000101473.16	0.43
UBTF	ENSG00000108312.14	0.42
ELMO2	ENSG00000062598.17	0.42
PLCG1	ENSG00000124181.14	0.42
THAP11	ENSG00000168286.2	0.42
UCKL1	ENSG00000198276.13	0.42
RALY	ENSG00000125970.11	0.42
MOCS3	ENSG00000124217.4	0.42
PRPF6	ENSG00000101161.7	0.41
CENPB	ENSG00000125817.7	0.41
RBM10	ENSG00000182872.15	0.41
MLST8	ENSG00000167965.17	0.41
ACD	ENSG00000102977.13	0.41
MANBAL	ENSG00000101363.12	0.41
PRR3	ENSG00000204576.11	0.41
DHX35	ENSG00000101452.14	0.41
VPS52	ENSG00000223501.8	0.41
RANBP3	ENSG00000031823.14	0.41
C11orf68	ENSG00000175573.6	0.41
RBM23	ENSG00000100461.17	0.41
TOMM34	ENSG00000025772.7	0.41
SOGA1	ENSG00000149639.14	0.41
CTBP1	ENSG00000159692.15	0.41
KAT5	ENSG00000172977.12	0.41
BTBD2	ENSG00000133243.8	0.4
SSBP4	ENSG00000130511.15	0.4
CRTC1	ENSG00000105662.15	0.4
RAVER1	ENSG00000161847.13	0.4
TAF6	ENSG00000106290.14	0.4
SCAF1	ENSG00000126461.14	0.4
ZNF629	ENSG00000102870.5	0.4
PIGU	ENSG00000101464.10	0.4
ZNF219	ENSG00000165804.15	0.4
ERF	ENSG00000105722.9	0.4
CHERP	ENSG00000085872.14	0.4
LSM14B	ENSG00000149657.19	0.4
OTUB1	ENSG00000167770.11	0.4
CIZ1	ENSG00000148337.19	0.4
SYS1	ENSG00000204070.9	0.4
SF3A2	ENSG00000104897.9	0.4
AHDC1	ENSG00000126705.13	0.4
USP19	ENSG00000172046.18	0.4
ZBTB12	ENSG00000204366.3	0.4
DIDO1	ENSG00000101191.16	0.4
ZNF771	ENSG00000179965.11	0.39
LZTS2	ENSG00000107816.17	0.39
IPO9	ENSG00000198700.9	0.39
PACS2	ENSG00000179364.13	0.39
TTI1	ENSG00000101407.12	0.39
MED12	ENSG00000184634.15	0.39
FIZ1	ENSG00000179943.7	0.39
WIZ	ENSG00000011451.17	0.39
CABLES2	ENSG00000149679.11	0.39
COPS7B	ENSG00000144524.17	0.39
HNRNPUL1	ENSG00000105323.16	0.39
DMWD	ENSG00000185800.11	0.39
INO80E	ENSG00000169592.14	0.39
ZNF512B	ENSG00000196700.7	0.39
MEN1	ENSG00000133895.14	0.39
TAF6L	ENSG00000162227.7	0.39
SNRNP200	ENSG00000144028.14	0.39
RFX1	ENSG00000132005.8	0.39
MAP2K7	ENSG00000076984.17	0.39
